# Supplementary material for: A Clinical Perspective on the Relevance of Research Domain Criteria in Electronic Health Records
Source: Atypon-hosted journal article supplement (doi:10.1176/appi.ajp.2014.14091177), 2015-04-01
Supplement: appi.ajp.2014.14091177.ds001.pdf [file appi.ajp.2014.14091177.ds001.pdf]

**TABLE S1. Cox Regression Examining Association Between All-Cause Hospital Readmission Hazard and Individual Estimated Research Domain Criteria Scores**

|                            | <b>Hazard Ratio</b> | <b>p</b> |
|----------------------------|---------------------|----------|
| eCognitive                 | 1.07                | 0.78     |
| eNegative                  | 1.95                | 0.03*    |
| ePositive                  | 0.88                | 0.58     |
| eRegulatory                | 0.87                | 0.59     |
| eSocial                    | 0.59                | 0.04*    |
| Age (years)                | 1.00                | 0.20     |
| Gender (male)              | 0.97                | 0.77     |
| <b>Race (v AA)</b>         |                     |          |
| Asian                      | 1.15                | 0.32     |
| Hispanic                   | 0.79                | 0.25     |
| Other                      | 0.87                | 0.29     |
| White                      | 0.43                | 0.004    |
|                            |                     |          |
| Public insurance           | 0.62                | 0.000    |
| Charlson comorbidity index | 1.06                | 0.000    |
| Schizophrenia              | 1.43                | 0.05     |
| Major depression           | 1.08                | 0.43     |
| Schizoaffective            | 1.37                | 0.08     |
